# Supplementary material for: Fabrication and catalytic properties of three-dimensional ordered zeolite arrays with interconnected micro-meso-macroporous structure
Source: Royal Society of Chemistry journal article supplement (doi:10.1039/c6ta02721k), 2016-01-01
Supplement: c6ta02721k1.pdf [file c6ta02721k1.pdf]

## Supporting Information

### Fabrication and Catalytic Properties of Three-Dimensional Ordered Zeolite Arrays with Interconnected Micro-Meso-Macroporous Structure

Ning Wang, Weizhong Qian,\* and Fei Wei

**Table S1** Textural parameters of AAO, SiO<sub>2</sub>-NTAs and MFI zeolites.

| Type                   | Theoretical Si/Al atomic ratio | Si/Al atomic ratio <sup>a</sup> | S <sub>BET</sub> (m <sup>2</sup> /g) | V <sub>t</sub> <sup>b</sup> (cm <sup>3</sup> /g) | V <sub>mic</sub> <sup>b</sup> (cm <sup>3</sup> /g) | V <sub>meso</sub> <sup>b</sup> (cm <sup>3</sup> /g) |
|------------------------|--------------------------------|---------------------------------|--------------------------------------|--------------------------------------------------|----------------------------------------------------|-----------------------------------------------------|
| AAO-1                  | -                              | -                               | 95.4                                 | 1.12                                             | 0.00                                               | 0.10                                                |
| AAO-2                  | -                              | -                               | 32.1                                 | 0.02                                             | 0.00                                               | 0.02                                                |
| SiO <sub>2</sub> -NTAs | -                              | -                               | 40.6                                 | 0.13                                             | 0.00                                               | 0.03                                                |
|                        | 8                              | 8.8                             | 501.1                                | 0.89                                             | 0.14                                               | 0.66                                                |
| MFI NRAs               | 15                             | 17.2                            | 479.1                                | 0.98                                             | 0.14                                               | 0.71                                                |
|                        | 30                             | 32.4                            | 557.1                                | 1.09                                             | 0.11                                               | 0.90                                                |
| MFI NRAs               |                                |                                 |                                      |                                                  |                                                    |                                                     |
| without P123           | 30                             | 32.1                            | 431.6                                | 0.64                                             | 0.12                                               | 0.45                                                |
| MFI NPs                | 30                             | 33.5                            | 452.2                                | 0.81                                             | 0.18                                               | 0.51                                                |

<sup>a</sup> Si/Al atomic ratios measured by ICP-OES.

<sup>b</sup> Pore volume determined via the NLDFIT method.

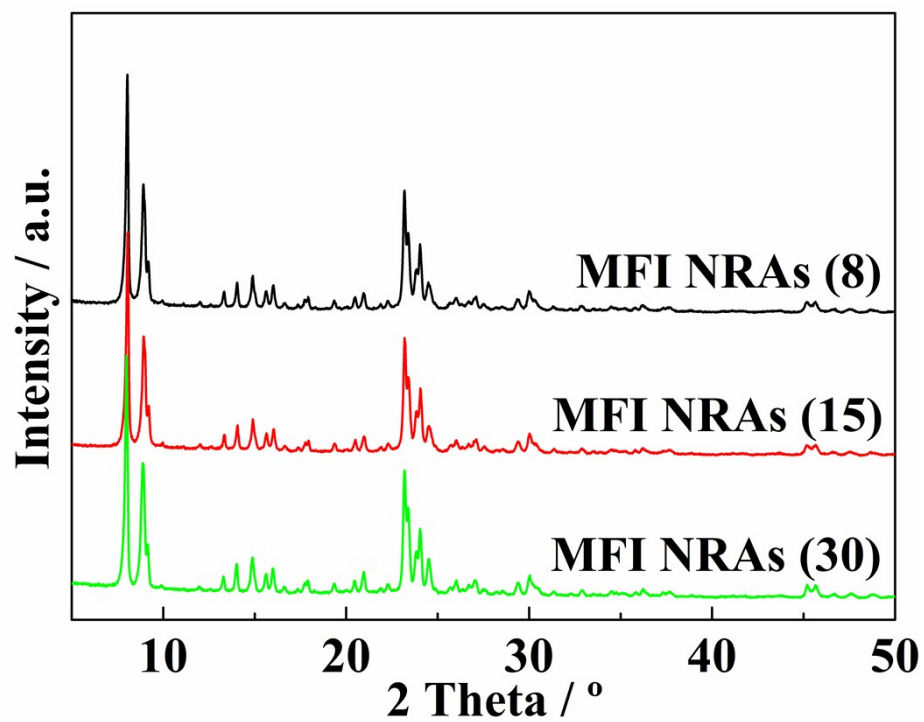

**Fig. S1** XRD patterns of MFI NRAs with various Si/Al molar ratios.

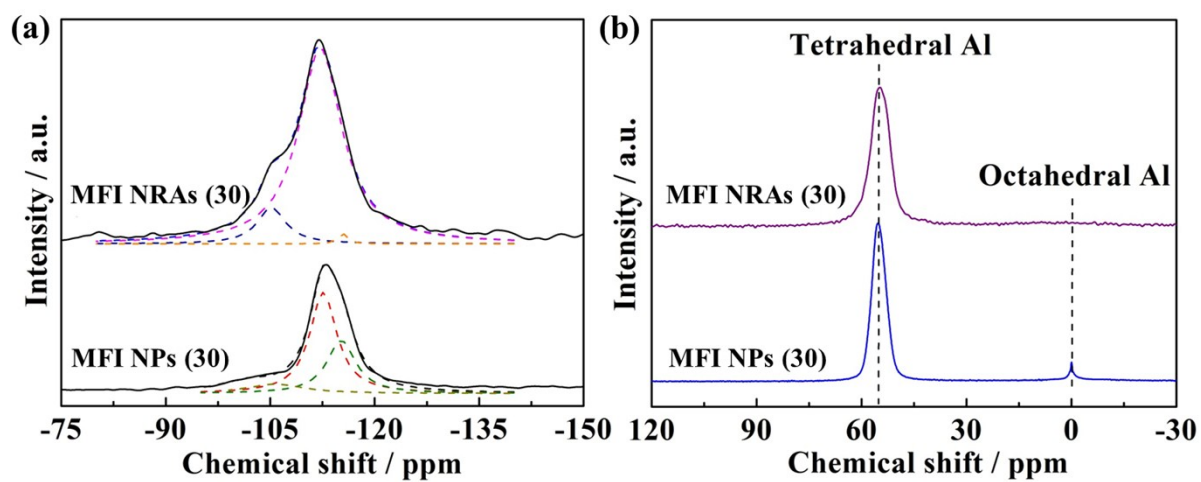

**Fig. S2** (a)  $^{29}\text{Si}$  NMR and (b)  $^{27}\text{Al}$  NMR of the MFI NRAs (30) and the MFI NPs (30).

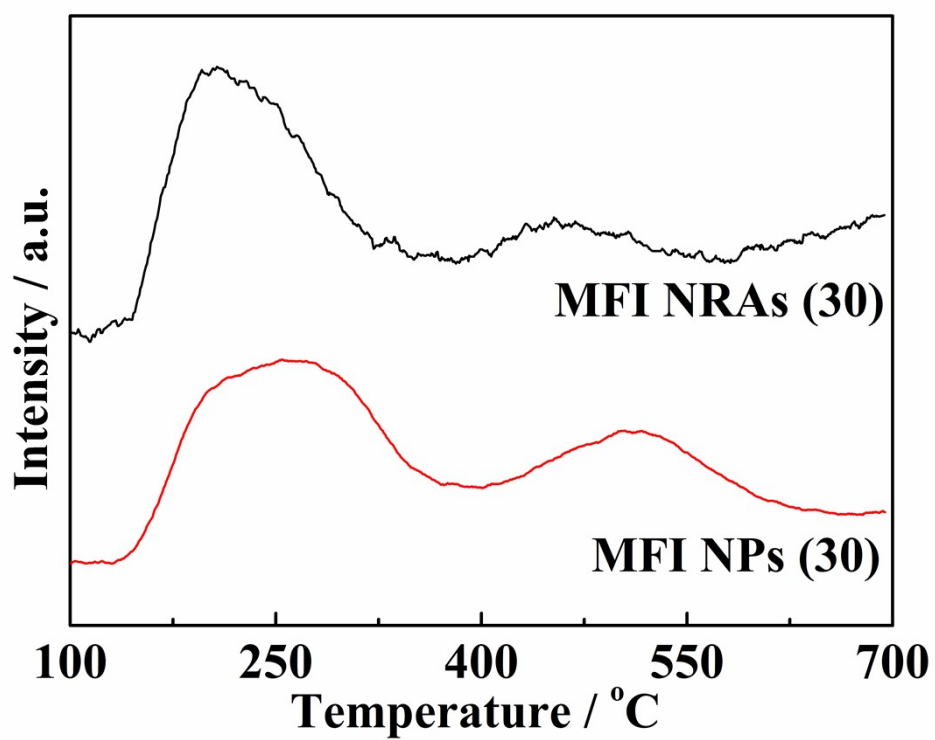

**Fig. S3** NH<sub>3</sub> temperature-programmed desorption profiles for MFI NRAs (30) and MFI NPs (30).

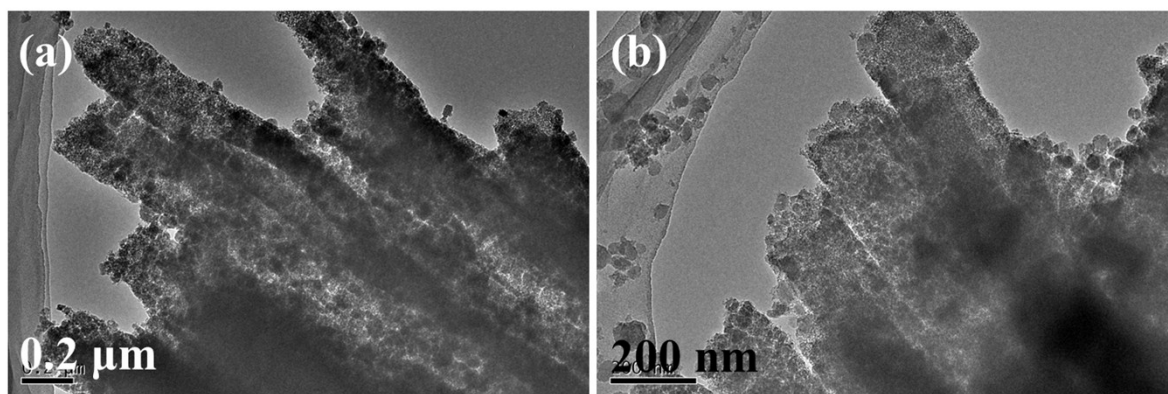

**Fig. S4** MFI NRAs (30) after (a) calcination (in air, 1000 °C, 2h) and (b) sonication treatment (high frequency (HF) = 50kHz, 100W, 1h).

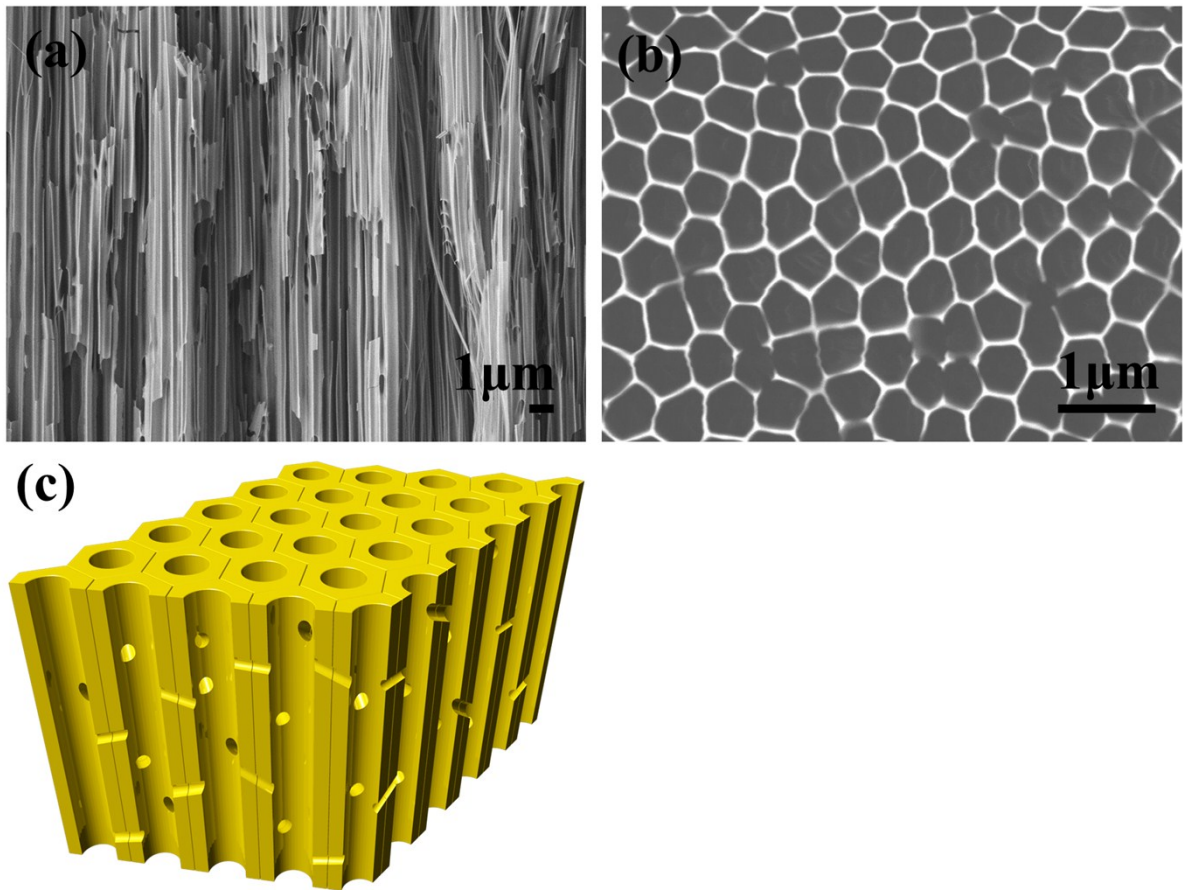

**Fig. S5** SEM images of the AAO-1: (a) cross-sectional view, (b) top view. (c) Schematic illustration of AAO-1.

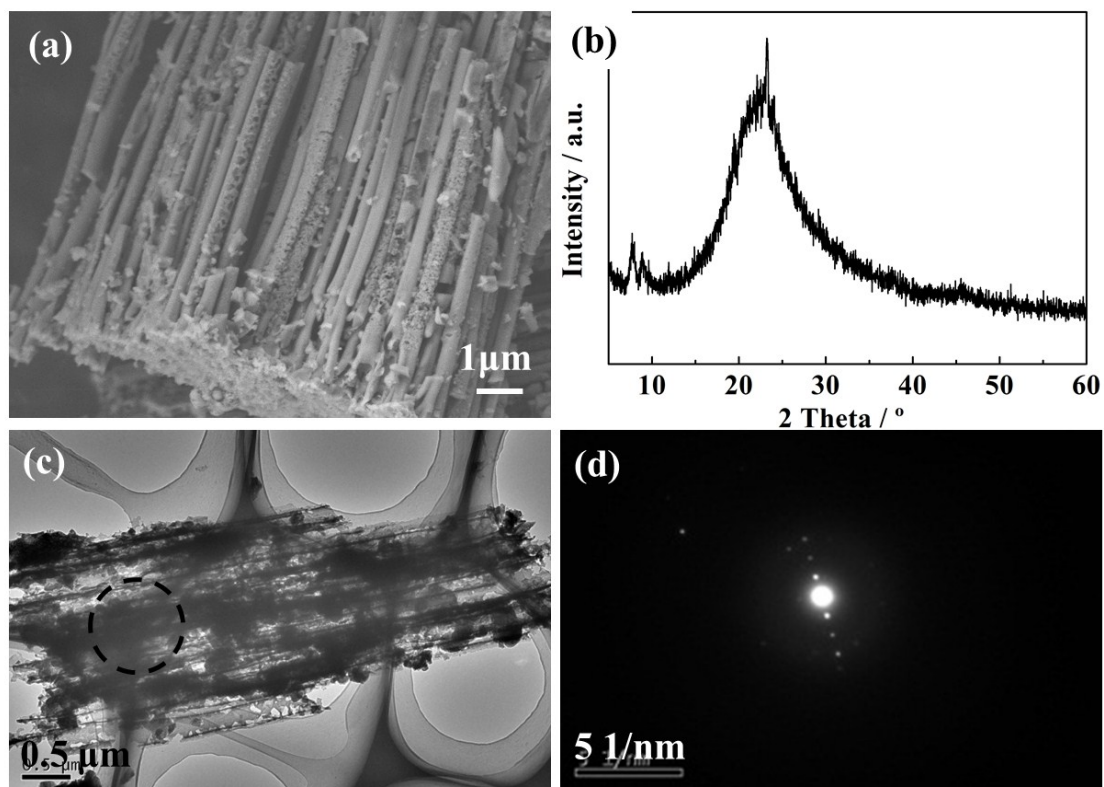

**Fig. S6** The obtained products using impregnation of zeolite seeds instead of in-situ formation of zeolite seeds: (a) SEM images, (b) XRD patterns, (c) TEM images and (d) the corresponding SAED patterns taken from the circled areas of (c).

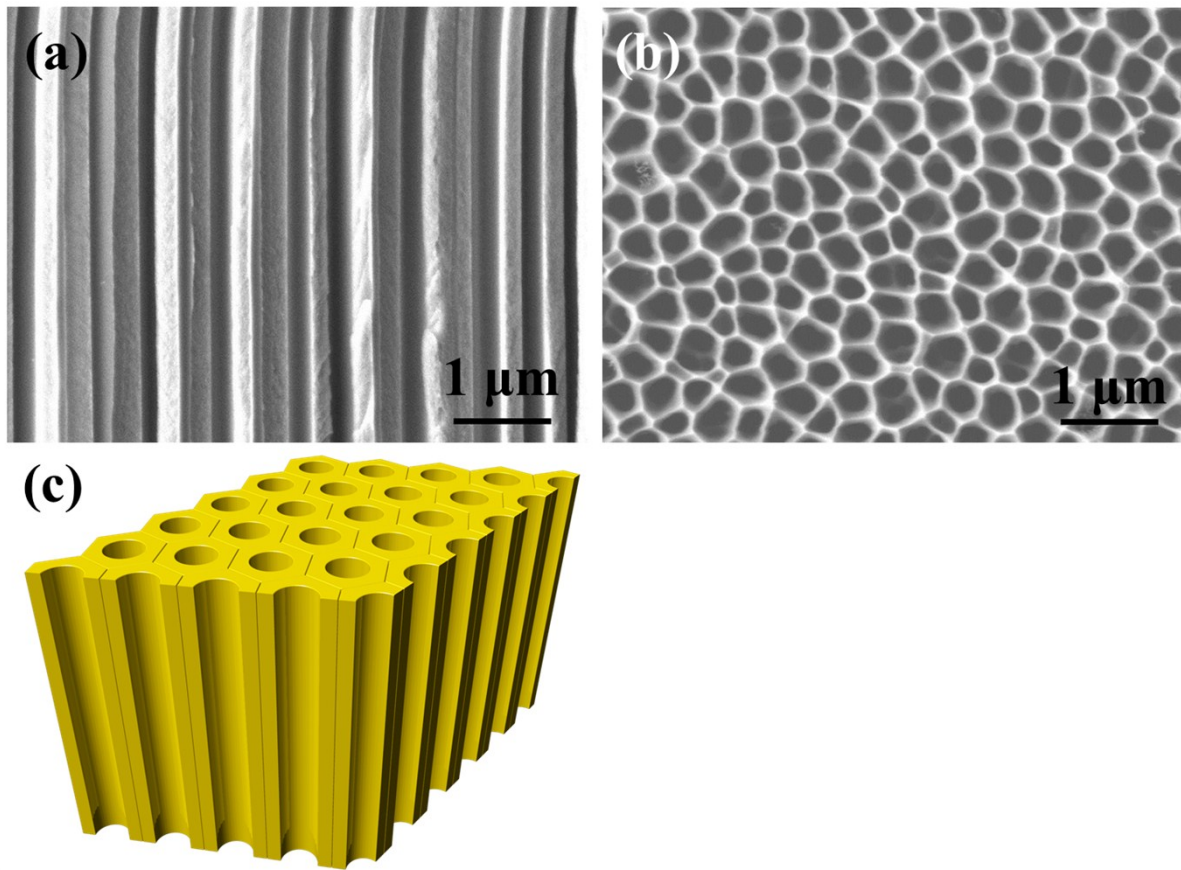

**Fig. S7** SEM images of the AAO-2: (a) cross-sectional view, (b) top view. (c) Schematic illustration of AAO-2.



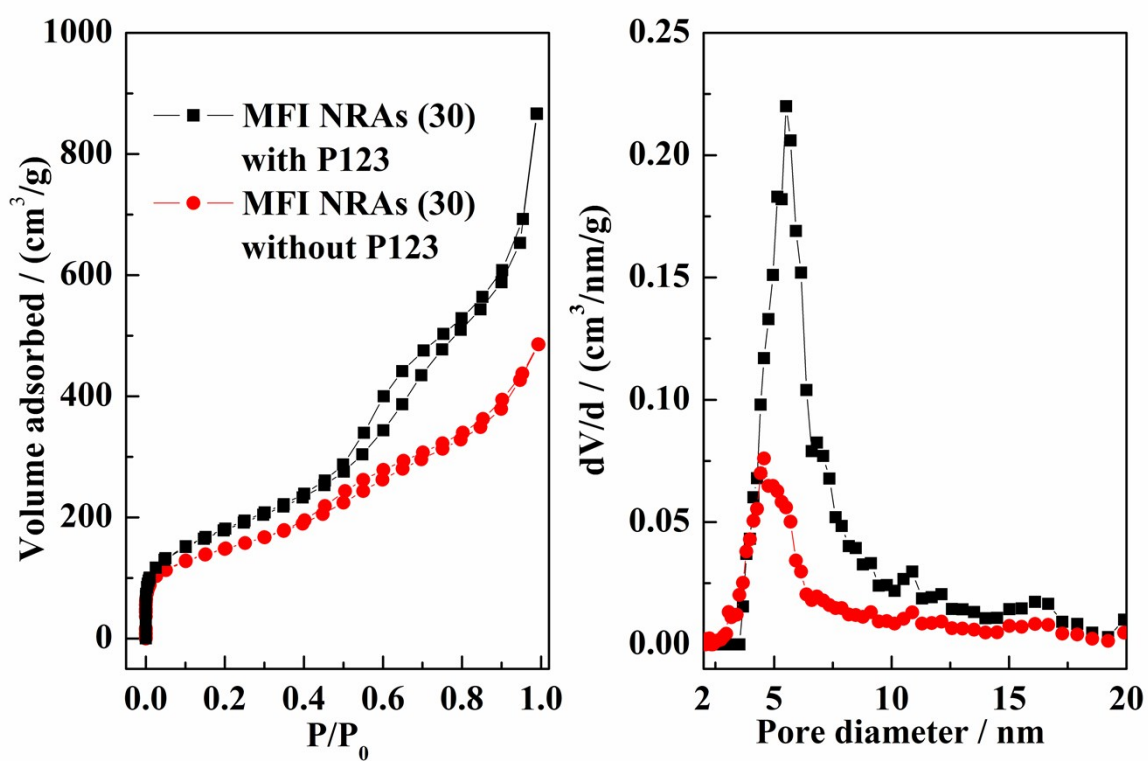

**Fig. S8** (a) Ar adsorption/desorption isotherms and (b) their pore size distribution of MFI NRAs (30) with and without P123.
